# Supplementary material
Source: Springer Nature journal article supplement (https://www.springermedizin.de/resource/supplementary/12916_2012_718_MOESM2_ESM.pdf/9598740)

**a injected muscle**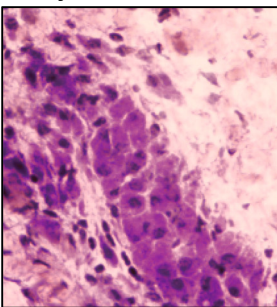**b**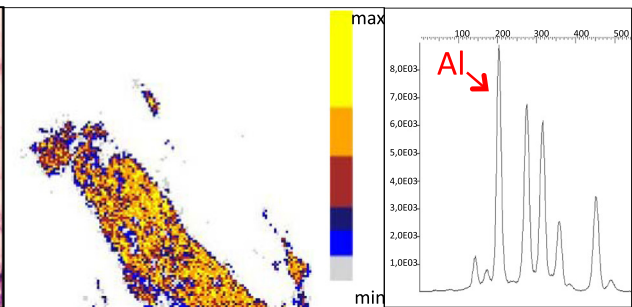**c spleen**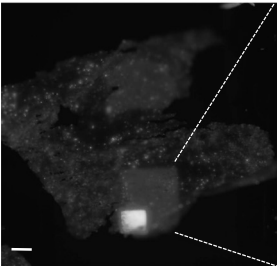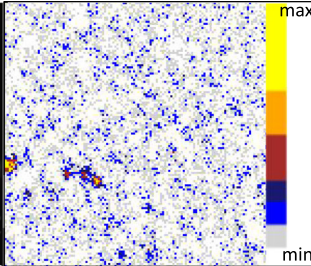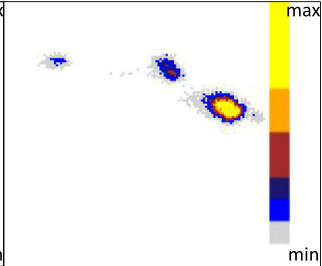**d brain**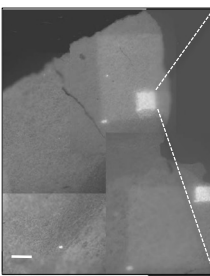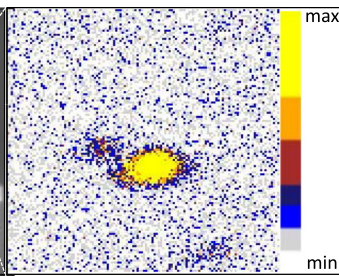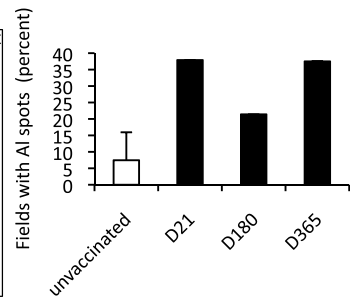

Supplement: MOESM2 [file 9598740]
